# Supplementary material
Source: publisher figshare collection journal article supplement (https://frontiersin.figshare.com/ndownloader/files/26271211)

# Repurposing the antiemetic metoclopramide as an antiviral against dengue virus infection in neuronal cells

## Supporting Information

### Supporting Figure Legends

**Figure S1.** Effects of MCP on cell growth and cytotoxicity. (A) MTT assays showed the dose-dependent effects of MCP on the cell growth of Neuro-2a cells. (B) Lactate dehydrogenase (LDH) assays showed the cytotoxicity in MCP-treated Neuro-2a cells at different concentrations. OD, optical density. The quantitative data are depicted as the mean  $\pm$  SD of three independent experiments. \*  $p < 0.05$  and \*\*  $p < 0.01$ . ns, not significant.

**Figure S2.** MCP treatment inhibits DENV2 infection. The Western blotting analysis showed viral protein expression during viral infection at 24 hours post-infection in (A) the Neuro-2a and (B) BHK-21 cells inoculated with DENV2 (MOI=1) in the presence of MCP. The clathrin inhibitor chlorpromazine (CPZ; 5 ng/ml) was used as a positive control.  $\beta$ -actin served as an internal control.

**Figure S3.** MCP treatment does not enhance IFN- $\beta$  production. ELISA analysis showing IFN- $\beta$  production in the DENV2 (MOI = 1)-infected Neuro-2a cells for 24 hours with or without MCP pretreatment. PBS was used as the solvent control. OD, optical density. The quantitative data are depicted as the mean  $\pm$  SD of three independent experiments. \*\*  $p < 0.01$ , compared with the untreated cells. ns, not significant compared with DENV.

Shen et al Supplemental Figure 1

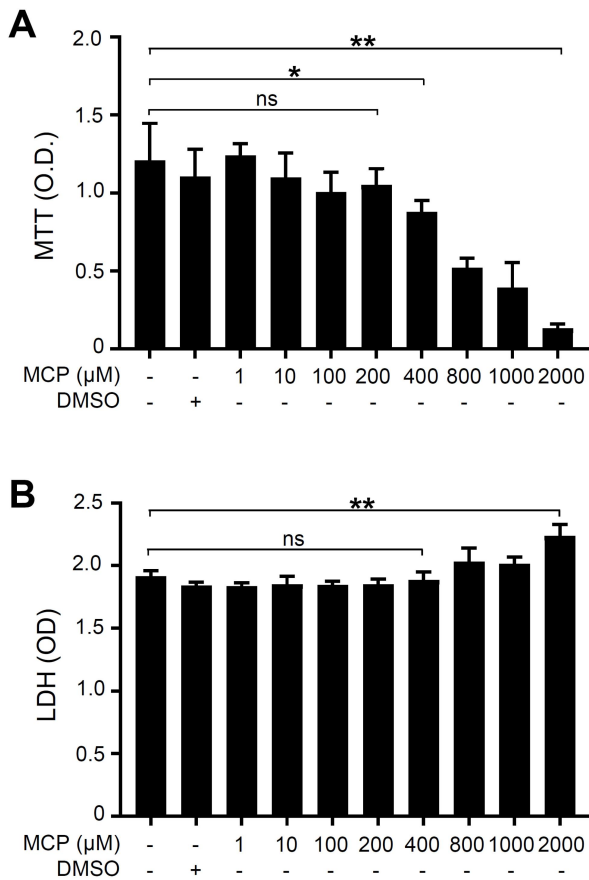

Shen et al Supplemental Figure 2

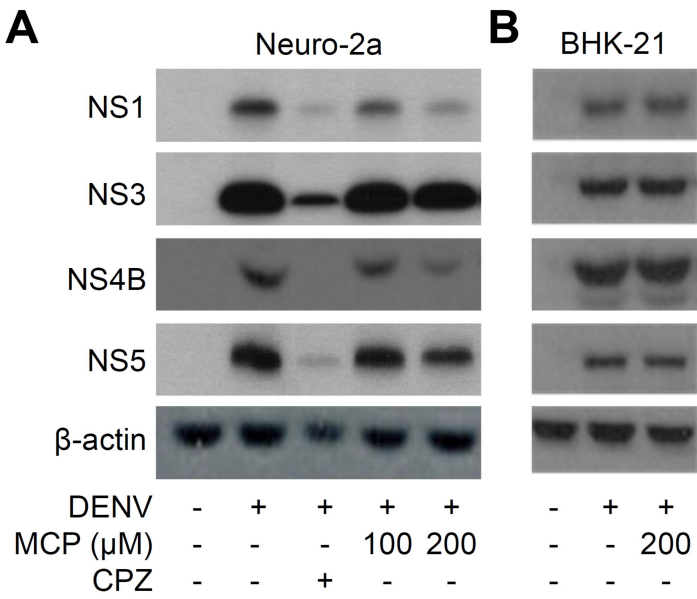

## Shen et al Supplemental Figure 3

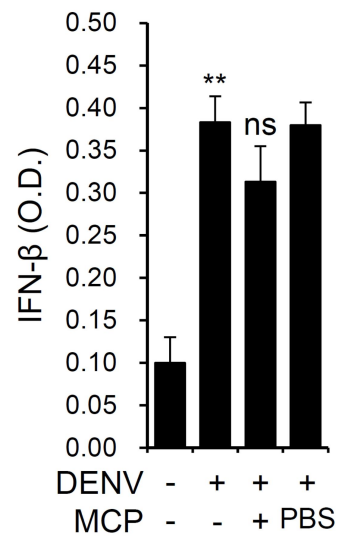

Supplement: Supplementary file [file 26271211]
